# Supplementary material for: Prices, availability and affordability of medicines in Rwanda
Source: PubMed Central journal article supplement (PMC7398547; doi:10.1371/journal.pone.0236411), 2020-08-03
Supplement: pone.0236411.s001.pdf [file pone.0236411.s001.pdf]

**S1 Table: Availability of surveyed medicines**

| Class of medicines/<br>indication         | Surveyed medicines                    |               | Originator brand |                   |                           | Lowest price generic |                   |                           | Originator and lowest price<br>generic combined |                   |                           |
|-------------------------------------------|---------------------------------------|---------------|------------------|-------------------|---------------------------|----------------------|-------------------|---------------------------|-------------------------------------------------|-------------------|---------------------------|
|                                           | Medicine<br>Name                      | Medicine list | Public<br>(n=15) | Private<br>(n=12) | Faith-<br>based<br>(n=17) | Public<br>(n=15)     | Private<br>(n=12) | Faith-<br>based<br>(n=17) | Public<br>(n=15)                                | Private<br>(n=12) | Faith-<br>based<br>(n=17) |
| Medicines for MCCH                        | Tranexamic acid injection             | Supplementary |                  |                   |                           | 0.0%                 | 8.3%              | 0.0%                      | 0.0%                                            | 8.3%              | 0.0%                      |
|                                           | Paracetamol suspension                | Global        |                  |                   |                           | 80.0%                | 100.0%            | 76.5%                     | 80.0%                                           | 100.0%            | 76.5%                     |
|                                           | Oxytocin injection                    | Supplementary |                  |                   |                           | 73.3%                | 8.3%              | 82.4%                     | 73.3%                                           | 8.3%              | 82.4%                     |
|                                           | Misoprostol                           | Supplementary | 66.7%            | 41.7%             | 40.0%                     | 33.3%                | 0.0%              | 60.0%                     | 100.0%                                          | 41.7%             | 100.0%                    |
|                                           | Levonorgestrel                        | Supplementary | 0.0%             | 50.0%             | 0.0%                      | 0.0%                 | 41.7%             | 0.0%                      | 0.0%                                            | 58.3%             | 0.0%                      |
|                                           | <b>Average for medicines for MCCH</b> |               | 33.3%            | 45.8%             | 20.0%                     | 37.3%                | 31.7%             | 43.8%                     | 50.7%                                           | 43.3%             | 51.8%                     |
| Medicines against NCDs                    | Simvastatin                           | Global        | 0.0%             | 0.0%              | 0.0%                      | 0.0%                 | 33.3%             | 0.0%                      | 0.0%                                            | 33.3%             | 0.0%                      |
|                                           | Salbutamol inhaler                    | Global        | 20.0%            | 83.3%             | 23.5%                     | 60.0%                | 41.7%             | 52.9%                     | 73.3%                                           | 100.0%            | 76.5%                     |
|                                           | Omeprazole                            | Global        |                  |                   |                           | 66.7%                | 91.7%             | 80.0%                     | 66.7%                                           | 91.7%             | 80.0%                     |
|                                           | Metformin                             | Global        | 6.7%             | 50.0%             | 0.0%                      | 60.0%                | 100.0%            | 64.7%                     | 60.0%                                           | 100.0%            | 64.7%                     |
|                                           | Diclofenac                            | Global        |                  |                   |                           | 80.0%                | 50.0%             | 82.4%                     | 80.0%                                           | 50.0%             | 82.4%                     |
|                                           | Diazepam                              | Global        | 0.0%             | 0.0%              | 0.0%                      | 80.0%                | 50.0%             | 76.5%                     | 80.0%                                           | 50.0%             | 76.5%                     |
|                                           | Captopril                             | Global        |                  |                   |                           | 80.0%                | 83.3%             | 100.0%                    | 80.0%                                           | 83.3%             | 100.0%                    |
|                                           | Amitriptyline                         | Global        |                  |                   |                           | 73.3%                | 91.7%             | 70.6%                     | 73.3%                                           | 91.7%             | 70.6%                     |
| <b>Average for medicines against NCDs</b> |                                       | 6.7%          | 33.3%            | 5.9%              | 62.5%                     | 67.7%                | 65.9%             | 64.2%                     | 75.0%                                           | 68.8%             |                           |
| Antibiotics                               | Metronidazole                         | Supplementary | 0.0%             | 8.3%              | 0.0%                      | 100.0%               | 83.3%             | 94.1%                     | 100.0%                                          | 83.3%             | 94.1%                     |
|                                           | Co-trimoxazole suspension             | Global        | 0.0%             | 0.0%              | 0.0%                      | 46.7%                | 100.0%            | 64.7%                     | 46.7%                                           | 100.0%            | 64.7%                     |
|                                           | Ciprofloxacin                         | Global        |                  |                   |                           | 66.7%                | 100.0%            | 70.6%                     | 66.7%                                           | 100.0%            | 70.6%                     |

|  |                                    |        |       |       |      |       |        |       |       |        |       |
|--|------------------------------------|--------|-------|-------|------|-------|--------|-------|-------|--------|-------|
|  | Ceftriaxone<br>injection           | Global |       |       |      | 66.7% | 83.3%  | 80.0% | 66.7% | 83.3%  | 80.0% |
|  | Amoxicillin                        | Global |       |       |      | 26.7% | 100.0% | 11.8% | 26.7% | 100.0% | 11.8% |
|  | <b>Average for<br/>antibiotics</b> |        | 0.0%  | 4.2%  | 0.0% | 61.3% | 93.3%  | 64.2% | 61.3% | 93.3%  | 64.2% |
|  | <b>Average for all medicines</b>   |        | 11.7% | 29.2% | 7.9% | 55.2% | 64.8%  | 59.3% | 59.6% | 71.3%  | 62.8% |
