# Supplementary material for: Prices, availability and affordability of medicines in Rwanda
Source: PubMed Central journal article supplement (PMC7398547; doi:10.1371/journal.pone.0236411), 2020-08-03
Supplement: pone.0236411.s002.pdf [file pone.0236411.s002.pdf]

**S2 Table: Medicines prices expressed as Median Price Ratios (MPRs)**

| Class of medicine      | Medicine name                       | Originator brand  |               |                |                    | Lowest-price generic  |               |                |                    |
|------------------------|-------------------------------------|-------------------|---------------|----------------|--------------------|-----------------------|---------------|----------------|--------------------|
|                        |                                     | Govt. Procurement | Patient MPR   |                |                    | Govt. Procurement MPR | Patient MPR   |                |                    |
|                        |                                     |                   | Public (n=15) | Private (n=12) | Faith-based (n=17) |                       | Public (n=15) | Private (n=12) | Faith-based (n=17) |
| Antibiotics            | Amoxicillin capsule 500mg           |                   |               |                |                    | 0.81                  | 1.09          | 1.85           |                    |
|                        | Ceftriaxone injection 1g            |                   |               |                |                    | 1.55                  | 2.24          | 1.67           | 2.24               |
|                        | Ciprofloxacin tablet 500mg          |                   |               |                |                    | 0.58                  | 0.84          | 1.49           | 1.00               |
|                        | Co-trimoxazole suspension 8+40mg/ml |                   |               |                |                    | 0.88                  | 1.00          | 1.27           | 1.03               |
|                        | Metronidazole tablet 250mg          |                   |               |                |                    | 0.85                  | 1.19          | 1.99           | 1.27               |
| Medicines against NCDs | Amitriptyline tablet 25mg           |                   |               |                |                    | 0.38                  | 0.59          | 3.96           | 0.55               |
|                        | Captopril tablet 25mg               |                   |               |                |                    | 0.44                  | 0.91          | 1.58           | 0.84               |
|                        | Diazepam tablet 5mg                 |                   |               |                |                    | 0.41                  | 0.75          | 2.60           | 0.81               |
|                        | Diclofenac tablet 50mg              |                   |               |                |                    | 0.54                  | 0.75          | 3.08           | 0.75               |
|                        | Metformin tablet 500mg              |                   |               | 4.43           |                    | 0.81                  | 0.89          | 3.69           | 0.96               |
|                        | Omeprazole capsule 20mg             |                   |               |                |                    | 0.66                  | 1.19          | 3.93           | 1.16               |
|                        | Salbutamol inhaler 100mcg/dose      |                   |               | 1.48           | 1.18               | 0.81                  | 1.31          | 1.51           | 1.31               |
|                        | Simvastatin tablet 20mg             |                   |               |                |                    |                       |               | 14.96          |                    |
| Medicines for MCH      | Levonorgestrel tablet 1.5mg         |                   |               | 11.48          |                    |                       |               | 5.40           |                    |
|                        | Misoprostol tablet 200mcg           |                   |               | 3.67           |                    | 0.70                  |               |                |                    |
|                        | Oxytocin injection 10IU/ml          |                   |               |                |                    | 1.76                  | 2.25          |                | 2.14               |
|                        | Paracetamol suspension 24mg/ml      |                   |               |                |                    | 0.50                  | 0.83          | 1.60           | 0.83               |
|                        | Tranexamic acid injection 100mg/ml  |                   |               |                |                    |                       |               |                |                    |
| Median                 | All medicines                       |                   |               | 4.05           | 1.18               | 0.70                  | 0.96          | 1.99           | 1.00               |
