# Supplementary material for: Prices, availability and affordability of medicines in Rwanda
Source: PubMed Central journal article supplement (PMC7398547; doi:10.1371/journal.pone.0236411), 2020-08-03
Supplement: pone.0236411.s003.pdf [file pone.0236411.s003.pdf]

**S3 Table: Medicines affordability expressed as amount of local currency (Rwf) and number of day's wages required for one course of treatment**

| Surveyed medicines     |                                          | Originator brand             |             |                              |             |                              |             | Lowest-price generic         |             |                              |             |                              |             |
|------------------------|------------------------------------------|------------------------------|-------------|------------------------------|-------------|------------------------------|-------------|------------------------------|-------------|------------------------------|-------------|------------------------------|-------------|
|                        |                                          | Public (n=15)                |             | Private (n=12)               |             | Faith-based (n=17)           |             | Public (n=15)                |             | Private (n=12)               |             | Faith-based (n=17)           |             |
| Class of medicines     | Treatment                                | Median Treatment Price (Rwf) | Days' Wages | Median Treatment Price (Rwf) | Days' Wages | Median Treatment Price (Rwf) | Days' Wages | Median Treatment Price (Rwf) | Days' Wages | Median Treatment Price (Rwf) | Days' Wages | Median Treatment Price (Rwf) | Days' Wages |
| Antibiotics            | Amoxicillin capsule 500mg x21            |                              |             |                              |             |                              |             | 617.4                        | 0.6         | 1050.0                       | 1.1         |                              |             |
|                        | Ceftriaxone injection 1g x1              |                              |             |                              |             |                              |             | 803.5                        | 0.8         | 600.0                        | 0.6         | 803.8                        | 0.8         |
|                        | Ciprofloxacin tablet 500mg x14           |                              |             |                              |             |                              |             | 394.8                        | 0.4         | 700.0                        | 0.7         | 470.4                        | 0.5         |
|                        | Co-trimoxazole suspension 8+40mg/ml 70ml |                              |             |                              |             |                              |             | 303.8                        | 0.3         | 385.0                        | 0.4         | 312.2                        | 0.3         |
|                        | Metronidazole tablet 250mg x42           |                              |             |                              |             |                              |             | 275.9                        | 0.3         | 459.9                        | 0.5         | 294.0                        | 0.3         |
| Medicines against NCDs | Amitriptyline tablet 25mg x90            |                              |             |                              |             |                              |             | 405.0                        | 0.4         | 2700.0                       | 2.7         | 375.4                        | 0.4         |
|                        | Captopril tablet 25mg x60                |                              |             |                              |             |                              |             | 1210.5                       | 1.2         | 2100.0                       | 2.1         | 1122.0                       | 1.1         |
|                        | Diazepam tablet 5mg x7                   |                              |             |                              |             |                              |             | 45.5                         | <0.1        | 157.5                        | 0.2         | 49.0                         | <0.1        |
|                        | Diclofenac tablet 50mg x60               |                              |             |                              |             |                              |             | 181.5                        | 0.2         | 750.0                        | 0.8         | 183.0                        | 0.2         |
|                        | Metformin tablet 500mg x90               |                              |             | 5400.0                       | 5.4         |                              |             | 1080.0                       | 1.1         | 4500.0                       | 4.5         | 1170.0                       | 1.2         |
|                        | Omeprazole capsule 20mg x30              |                              |             |                              |             |                              |             | 452.9                        | 0.5         | 1500.0                       | 1.5         | 440.9                        | 0.4         |
|                        | Salbutamol 100mcg/dose 200 dose inhaler  |                              |             | 2450.0                       | 2.5         | 1954                         | 2.0         | 2178.0                       | 2.2         | 2500.0                       | 2.5         | 2178.0                       | 2.2         |
|                        | Simvastatin tablet 20mg x30              |                              |             |                              |             |                              |             |                              |             | 6600.0                       | 6.6         |                              |             |
| Medicines for MCH      | Levonorgestrel tablet 1.5mg x1           |                              |             | 8500.0                       | 8.5         |                              |             |                              |             | 4000.0                       | 4.0         |                              |             |
